# Supplementary material for: Dopamine Self-Polymerization as a Simple and Powerful Tool to Modulate the Viscoelastic Mechanical Properties of Peptide-Based Gels
Source: MDPI journal article supplement (doi:10.3390/molecules26051363), 2021-03-04
Supplement: s1 [file s1]

Supporting info

# Dopamine Self-Polymerization as a Simple and Powerful Tool to Modulate the Viscoelastic Mechanical Properties of Peptide-Based Gels

Galit Fichman<sup>1</sup> and Joel P. Schneider<sup>1,\*</sup>

<sup>1</sup> Chemical Biology Laboratory, National Cancer Institute, National Institutes of Health, Frederick, Maryland, USA; [gali.fichman@nih.gov](mailto:gali.fichman@nih.gov) (G.F); [Joel.Schneider@nih.gov](mailto:Joel.Schneider@nih.gov) (J.P.S)

\* Correspondence: [Joel.Schneider@nih.gov](mailto:Joel.Schneider@nih.gov)

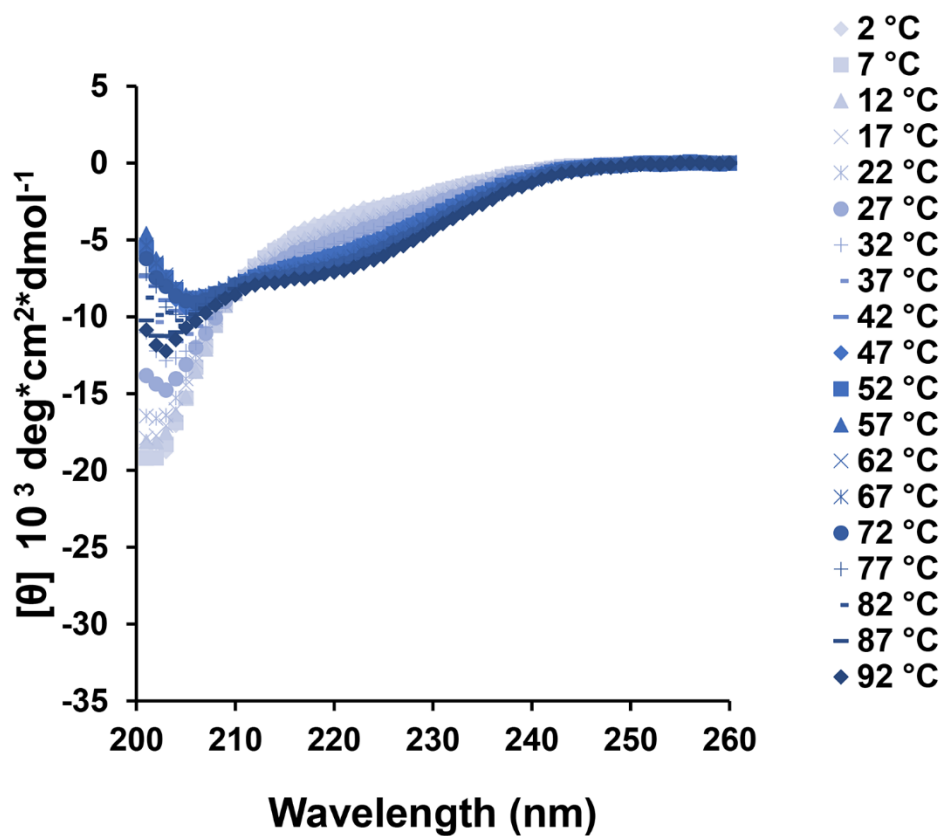

Figure S1. Temperature-dependent CD spectra of 1 wt% MAX1 in water.

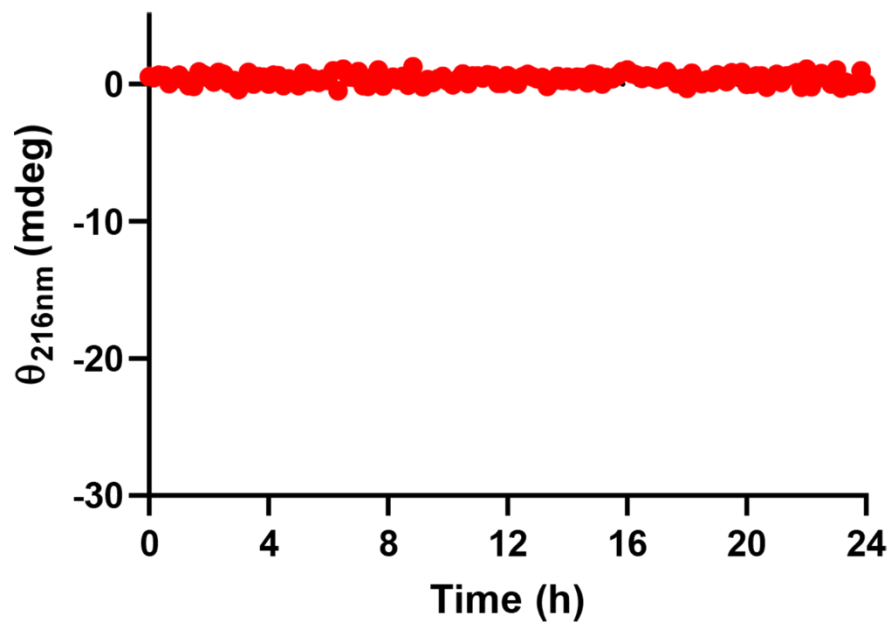

**Figure S2.**  $\theta_{216}$  values of 10 mM dopamine in HEPES buffer (75 mM HEPES, 150 mM NaCl, pH 7.4) collected at 37°C as a function of time.

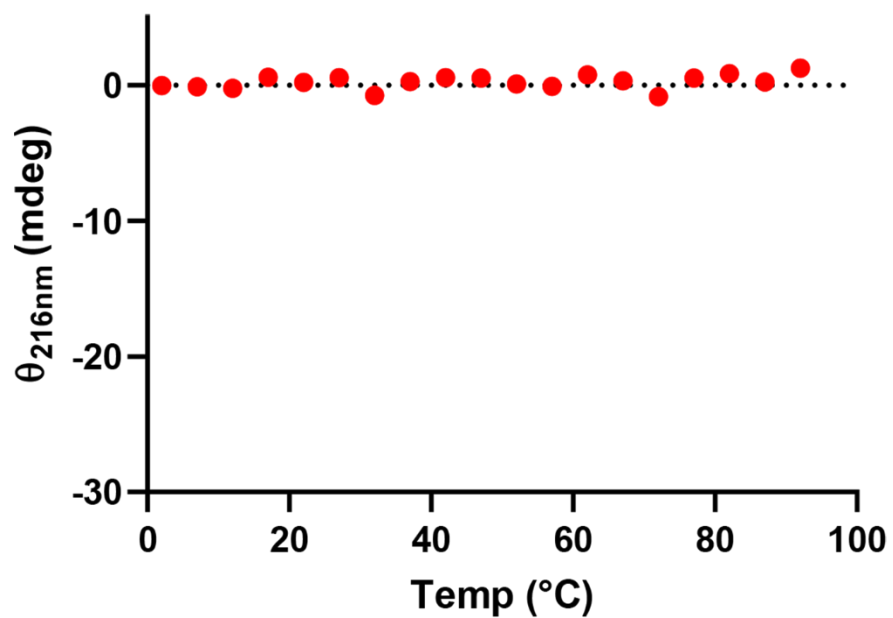

**Figure S3.** Temperature-dependent CD spectra of 10 mM dopamine in HEPES buffer (75mM HEPES, 150 mM NaCl, pH 7.4).

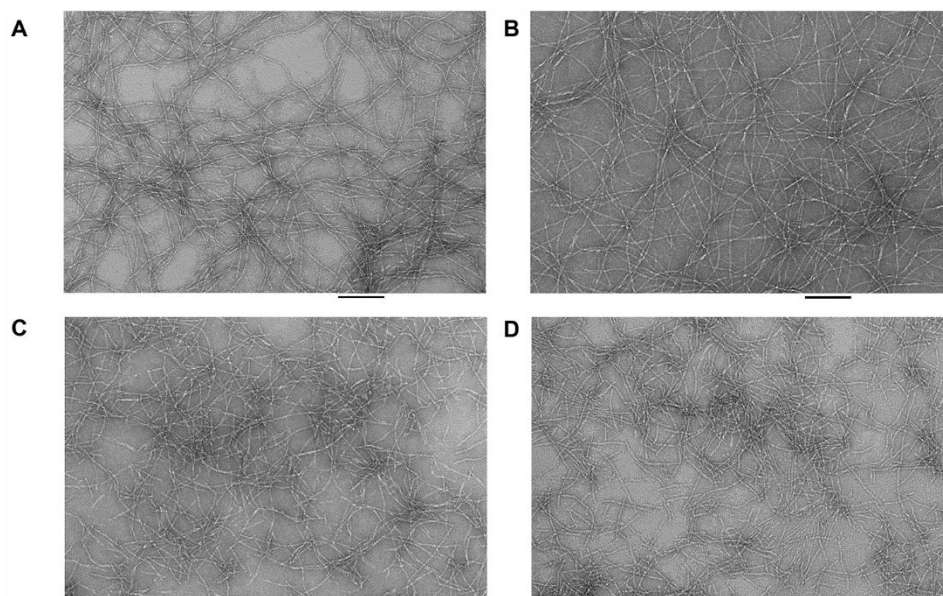

**Figure S4.** TEM micrographs showing fibrils isolated from 1 wt% MAX1 fibrillar gel networks 3 days after gelation is triggered in the absence or presence of 10 mM dopamine (A, B and C, D respectively). Scale bar =100 nm.

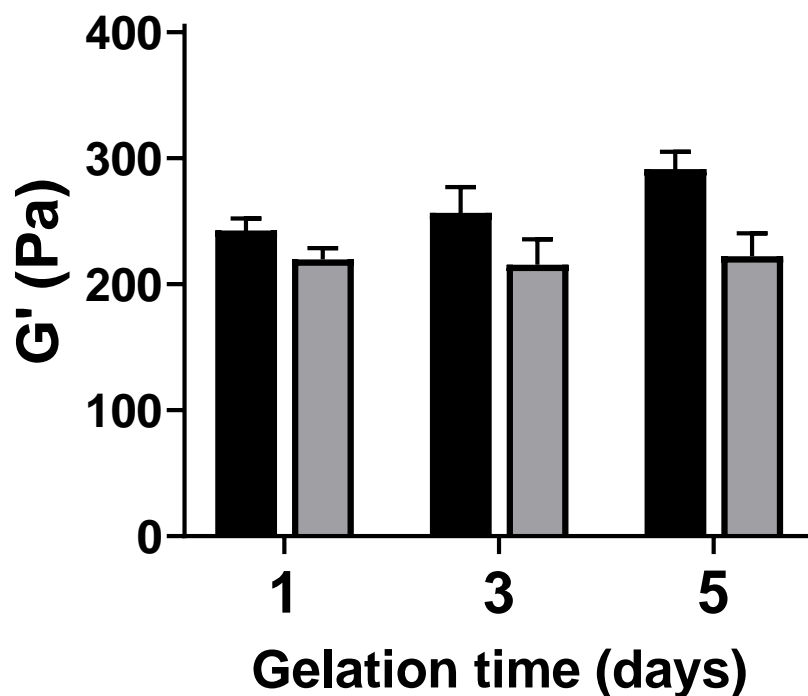

**Figure S5.** Rheological studies of MAX1 gels as a function of time.  $G'$  (0.2% strain, 6 rad/sec) of pre-formed 1wt% MAX1 peptide gel at 1, 3 or 5 days post triggering assembly. Left bar (black) represents the recorded  $G'$  value of the gel prior to shear-thinning at high strain (1000% strain, 30 sec) and right bar (gray) represents the recovered  $G'$  value obtained 10 minutes after the gel was shear-thinned.

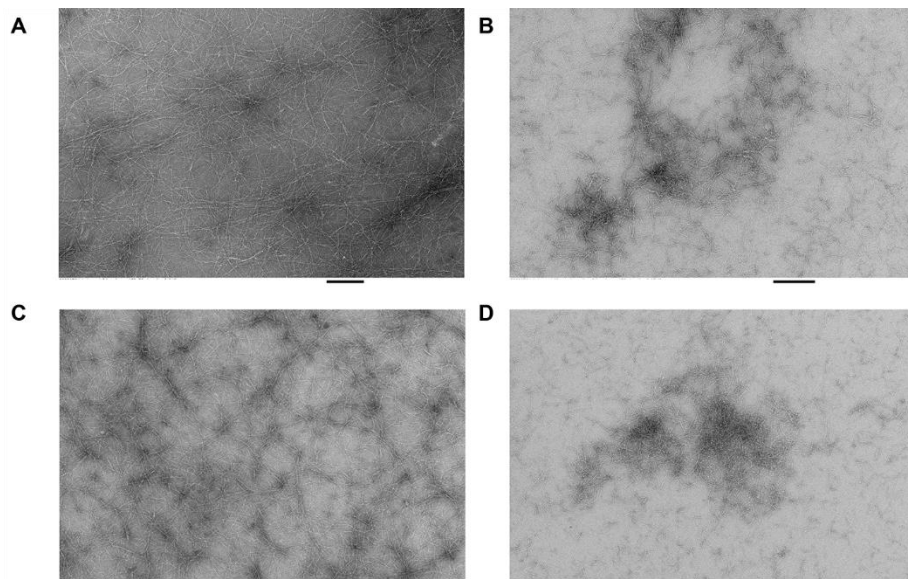

**Figure S6.** TEM micrographs showing fibrils isolated from 1 wt% MAX1 fibrillar gel networks 2 (A,B) or 4 (C, D) days after gelation is triggered in the absence (A, C) or presence (B,D) of 10 mM dopamine. Scale bar =200 nm.

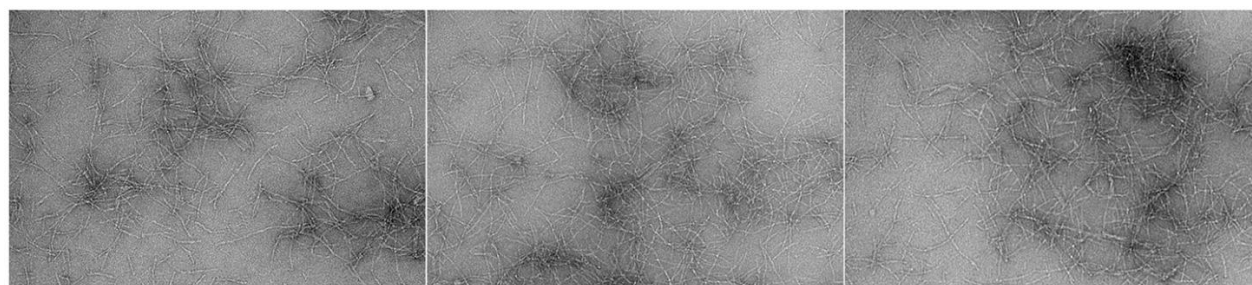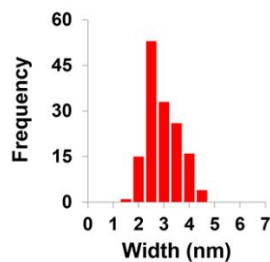

**Figure S7.** TEM micrographs showing fibrils isolated from 1 wt% MAX1 fibrillar gel networks 2 days after gelation is triggered in the presence of 10 mM dopamine. Scale bar =100 nm. Widths of individual fibrils of each sample were determined using ImageJ software, by measuring width of fibrils from 3 separate micrographs, representing different location of the fibrils on the grid, n=148.

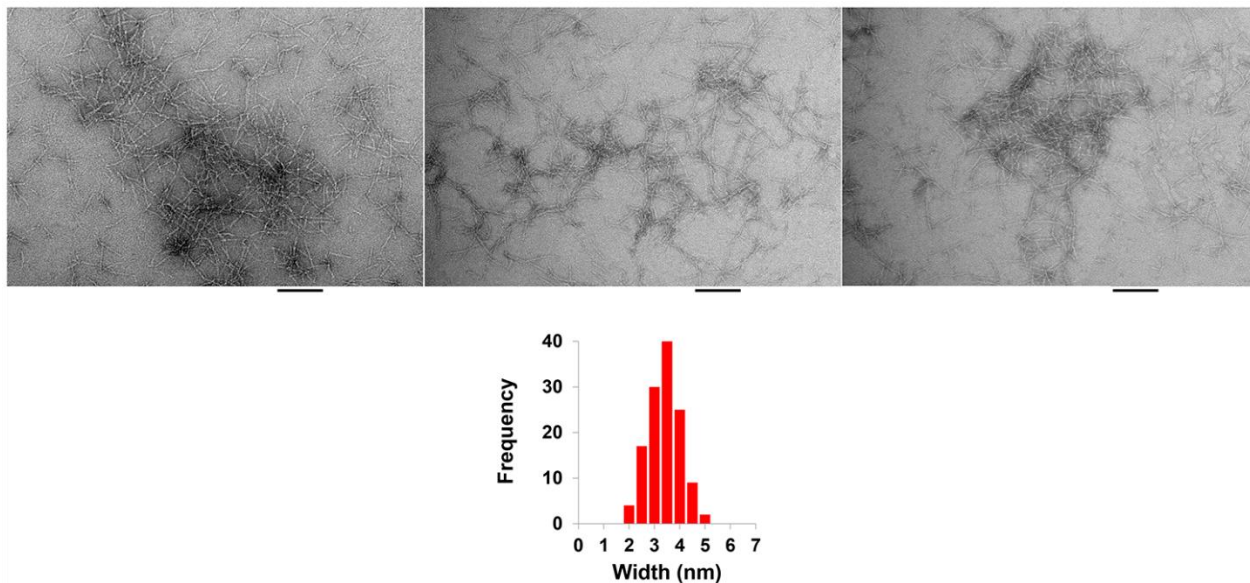

**Figure S8.** TEM micrographs showing fibrils isolated from 1 wt% MAX1 fibrillar gel networks 4 days after gelation is triggered in the presence of 10 mM dopamine. Scale bar =100 nm. Widths of individual fibrils of each sample were determined using ImageJ software, by measuring width of fibrils from 3 separate micrographs, representing different location of the fibrils on the grid, n=127.

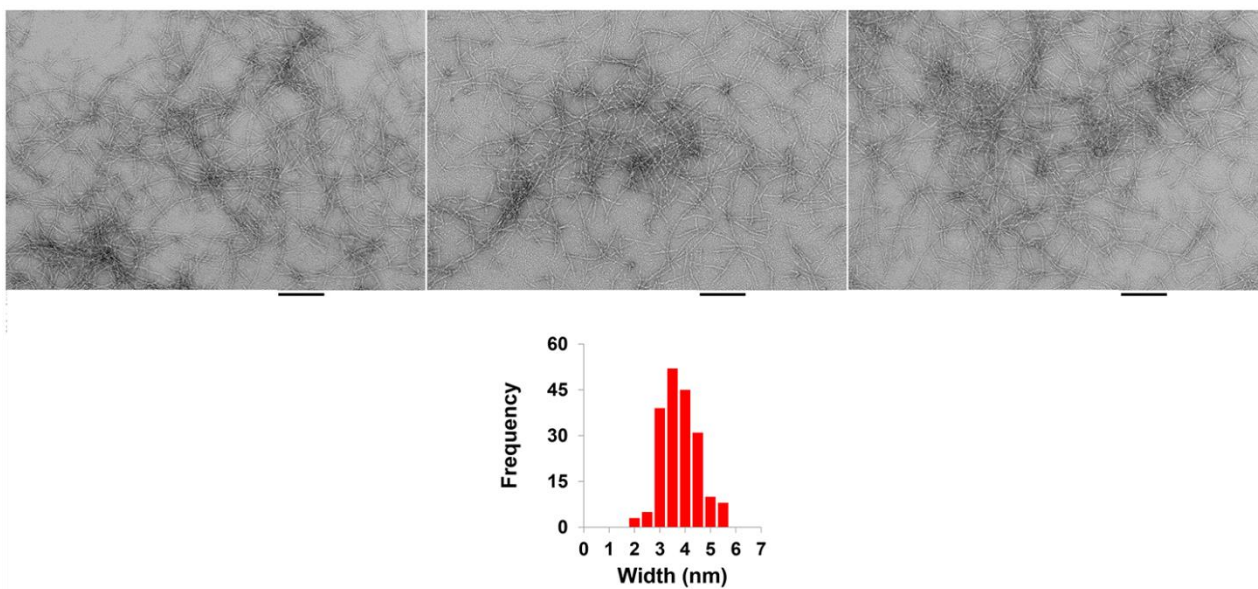

**Figure S9.** TEM micrographs showing fibrils isolated from 1 wt% MAX1 fibrillar gel networks 3 days after gelation is triggered in the presence of 40 mM dopamine. Scale bar =100 nm. Widths of individual fibrils of each sample were determined using ImageJ software, by measuring width of fibrils from 3 separate micrographs, representing different location of the fibrils on the grid, n=193.

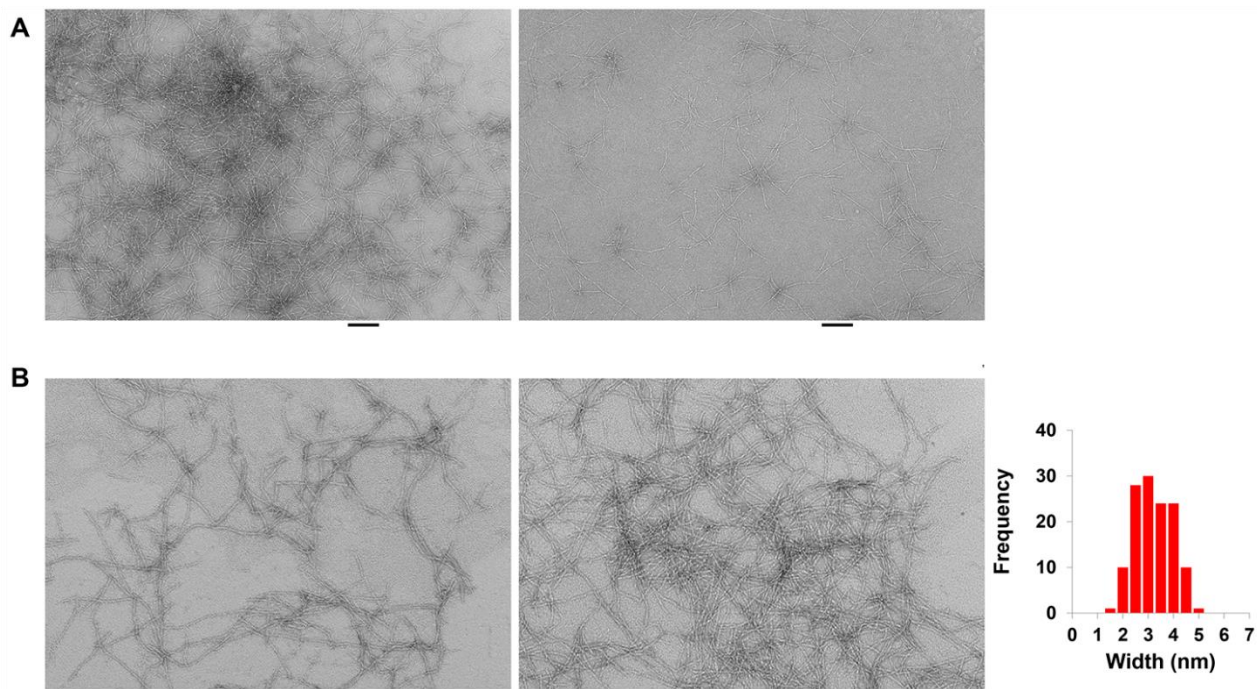

**Figure S10.** TEM micrographs showing fibrils isolated from 1 wt% MAX1 fibrillar gel networks 3 days after gelation is triggered in the presence of 1 mM dopamine. Scale bar =100 nm. **A.** Micrographs at lower magnifications showing the existence of two populations of long and short fibrils (left and right panel, respectively). **B.** Widths of individual fibrils of each sample were determined using ImageJ software, by measuring width of fibrils from 2 separate micrographs, representing different location of the fibrils on the grid, n=128.

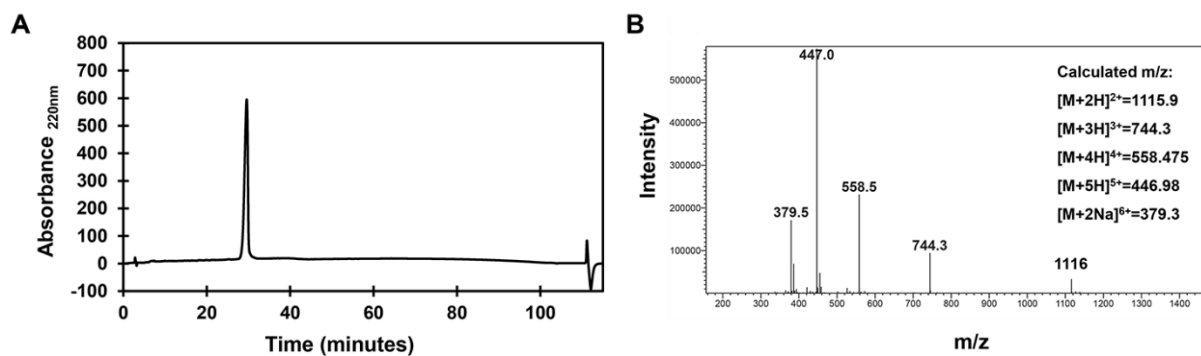

**Figure S11.** (A) Analytical HPLC (0%-100% B over 100 min) and (B) ESI (+) mass spectrum of purified MAX1 peptide.

| Figure                                    | Groups compared            | Statistical significance |
|-------------------------------------------|----------------------------|--------------------------|
| Figure 5A<br>Gelation/polymerization time | 1 day (I) vs 2 days (I)    | *                        |
|                                           | 2 days(I) vs 3 days(I)     | **                       |
|                                           | 3 days (I) vs 4 days (I)   | **                       |
|                                           | 4 days (I) vs 5 days (I)   | ns                       |
| Figure 5A<br>Gelation/polymerization time | 1 day (II) vs 2 days (II)  | ns                       |
|                                           | 2 days(II) vs 3 days(II)   | *                        |
|                                           | 3 days (II) vs 4 days (II) | ns                       |
|                                           | 4 days (II) vs 5 days (II) | ns                       |
| Figure 5A<br>Gelation/polymerization time | 1 day (I) vs (II)          | ***                      |
|                                           | 2 days(I) vs (II)          | ****                     |
|                                           | 3 days(I) vs (II)          | ns                       |
|                                           | 4 days(I) vs (II)          | *                        |
|                                           | 5 days(I) vs (II)          | *                        |
| Figure 5B<br>Dopamine [mM]                | 1 mM (I) vs 5 mM (I)       | ***                      |
|                                           | 5 mM (I) vs 10 mM (I)      | ***                      |
|                                           | 10 mM (I) vs 20 mM (I)     | *                        |
|                                           | 20 mM (I) vs 40 mM (I)     | *                        |
| Figure 5B<br>Dopamine [mM]                | 1 mM (II) vs 5 mM (II)     | **                       |
|                                           | 5 mM (II) vs 10 mM (II)    | ns                       |
|                                           | 10 mM (II) vs 20 mM (II)   | ns                       |
|                                           | 20 mM (II) vs 40 mM (II)   | ns                       |
| Figure 5B<br>Dopamine [mM]                | 1 mM (I) vs (II)           | **                       |
|                                           | 5 mM (I) vs (II)           | ns                       |
|                                           | 10 mM (I) vs (II)          | ns                       |
|                                           | 20 mM (I) vs (II)          | ns                       |
|                                           | 40 mM (I) vs (II)          | ns                       |
| Figure 6A<br>Dopamine [mM]                | 0 mM (I) vs 5 mM (I)       | ****                     |
|                                           | 5 mM (I) vs 10 mM (I)      | *                        |
|                                           | 10 mM (I) vs 20 mM (I)     | ns                       |
| Figure 6A<br>Dopamine [mM]                | 0 mM (II) vs 5 mM (II)     | **                       |
|                                           | 5 mM (II) vs 10 mM (II)    | ns                       |
|                                           | 10 mM (II) vs 20 mM (II)   | ns                       |
| Figure 6A<br>Dopamine [mM]                | 5 mM (I) vs 5 mM (II)      | ns                       |
|                                           | 10 mM (I) vs 10 mM (II)    | ns                       |
|                                           | 20 mM (I) vs 20 mM (II)    | ns                       |

**Table S1.** Statistical analysis for rheological measurements. Statistical analysis was performed using GraphPad Prism 8.3.8 (GraphPad Software). Differences were calculated using an unpaired two-tailed Student's *t*-test with *P* values being shown. Significance differences of \*, \*\*, \*\*\*, \*\*\*\* represent *P* values of  $P \leq 0.05$ ,  $P \leq 0.01$ ,  $P \leq 0.001$  and  $P \leq 0.0001$ . ns=no significance difference,  $P > 0.05$ .
